# Supplementary material for: Regulation of lipid droplet dynamics in Saccharomyces cerevisiae depends on the Rab7-like Ypt7p, HOPS complex and V1-ATPase
Source: PubMed Central journal article supplement (PMC4571102; doi:10.1242/bio.20148615), 2015-05-06
Supplement: supp_bio.20148615_BIO20148615supp.pdf [file supp_bio.20148615_BIO20148615supp.pdf]

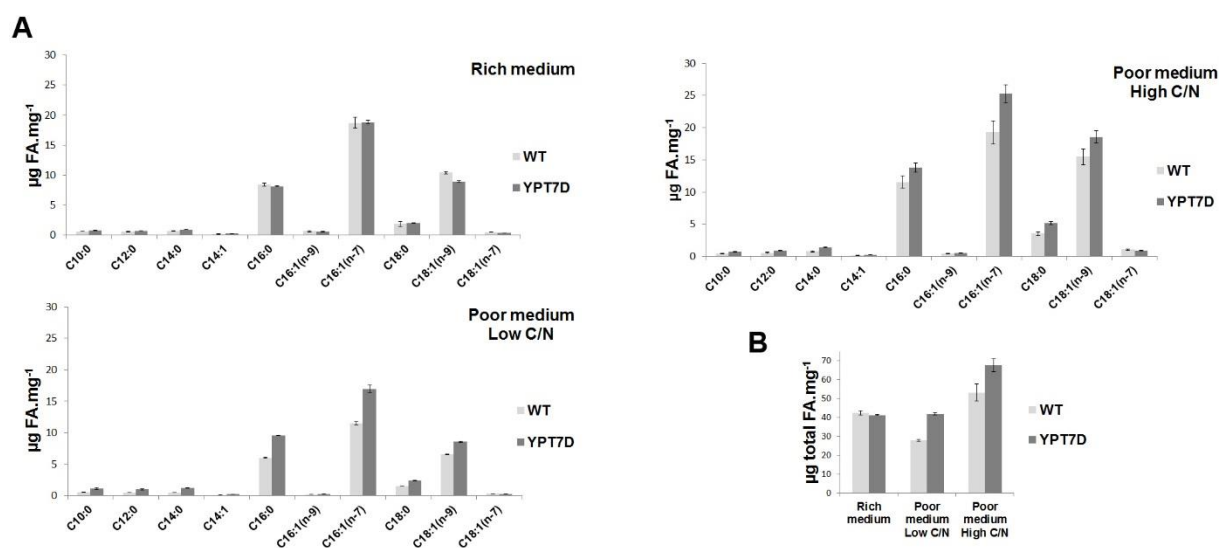

**Fig S1. FA accumulation induced by *Ypt7p* defect depends on nutrition conditions.** (A) Cells from *ypt7Δ* and WT strains were grown in rich medium (YPG) or poor medium (YNB low C/N or YNB high C/N) and processed for fatty acid methyl esters (FAME) production. Samples of the organic phase were separated by GC, and FAME identification was based on their retention time. The amount of each class of FA was expressed in µg of FA per mg of dry weight. (B) The total amount of FA accumulated in the three strains is shown for each type of medium.

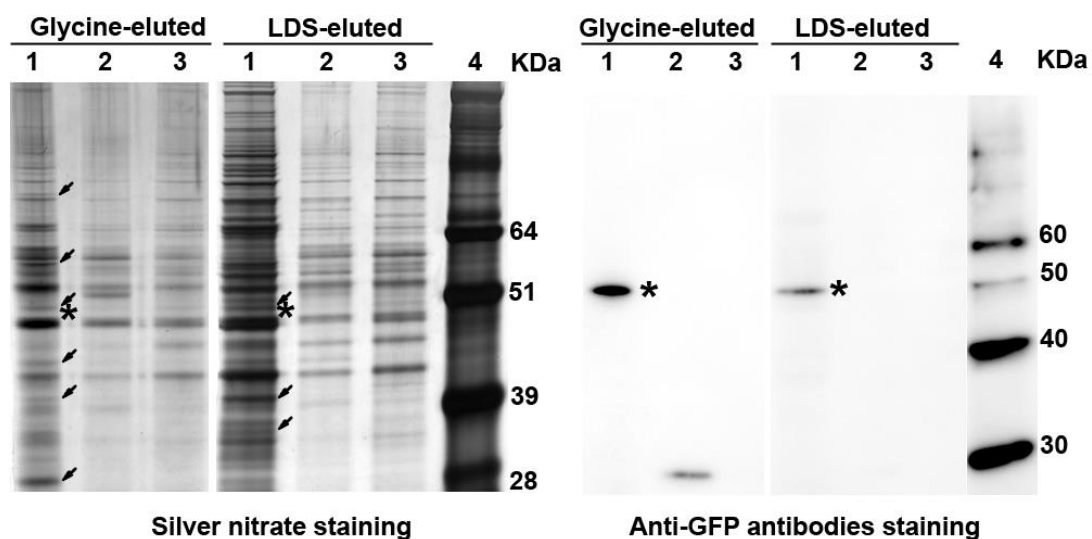

**Fig S2. Co-immunoprecipitation experiments following by SDS-PAGE analysis of Glycine- and LDS-eluted proteins, either silver nitrate stained, or immunoblotted with anti-GFP antibodies.** Lane 1: Assay (purified LDs from GFP-YPT7/ERG6-RFP); Lane 2: Control of GFP partners (soluble extract of proteins WT-p416GFP); Lane 3: Control of non-specific adsorption of proteins on GFPm (purified LDs from WT-p416GFP); Lane 4: Molecular weight marker. Arrows indicate the bands which were cut out of the gel and processed for mass-spectrometry analysis as described in the Materials and Methods. Stars indicate the position of GFP-Ypt7p.

**Table S1. Complete proteome of *S. cerevisiae* LDs**

| ORF    | Gene    | Function / Description (SGD)                                 | Localization (SGD) | Metabolism / Pathway (SGD)                     | Relative abundance (%) |
|--------|---------|--------------------------------------------------------------|--------------------|------------------------------------------------|------------------------|
| ACT1   | YFL039C | Actin                                                        | Ct                 | Cytoskeleton                                   | 0,29                   |
| ADE1   | YAR015W | SAICAR synthetase                                            | Cm/N               | Nucleotide metabolism                          | 0,45                   |
| ADE16  | YLR028C | AICAR transformylase and IMP cyclohydrolase                  | Ct                 | Nucleotide metabolism                          | 0,08                   |
| ADE17  | YMR120C | Bifunctional purine biosynthesis protein ADE17               | Ct/PM              | Nucleotide metabolism                          | 0,13                   |
| ADE5,7 | YGL234W | Bifunctional purine biosynthetic protein ADE5,7              | Cm                 | Nucleotide metabolism                          | 0,29                   |
| ADE6   | YGR061C | Formylglycinamide-ribonucleotide synthetase                  | Cm                 | Nucleotide metabolism                          | 0,07                   |
| ADH1   | YOL086C | Alcohol dehydrogenase                                        | Ct, PM             | Amino acid metabolism;<br>Glucose fermentation | 1,82                   |
| ADH5   | YBR145W | Alcohol dehydrogenase isoenzyme V                            | Cm/N               | Amino acid metabolism;<br>glucose fermentation | 0,19                   |
| ADK1   | YDR226W | Adenylate kinase                                             | Cm/M               | Nucleotide metabolism                          | 0,18                   |
| ADO1   | YJR105W | Adenosine kinase                                             | Cm/N               | Nucleotide metabolism                          | 0,19                   |
| ALD6   | YPL061W | Aldehyde dehydrogenase                                       | Ct/M               | Carbohydrate metabolism                        | 0,39                   |
| ARF1   | YDL192W | ADP-ribosylation factor; GTPase of the Ras superfamily       | Ct/Ve/G            | Protein trafficking                            | 0,67                   |
| ARF2   | YDL137W | ADP-ribosylation factor; GTPase of the Ras superfamily       | Ct/Ve/G            | Protein trafficking                            | 0,50                   |
| ASC1   | YMR116C | Guanine nucleotide-binding protein subunit beta-like protein | R/Cm               | Signal transduction                            | 0,45                   |
| ATP1   | YBL099W | ATP synthase                                                 | IntM/M             | Ion transport                                  | 0,05                   |
| AYR1   | YIL124W | 1-Acylidihydroxyacetone-phosphate reductase                  | ER/LB/Cm/IntM/M    | Lipid metabolism                               | 1,01                   |
| CDC19  | YAL038W | Pyruvate kinase                                              | Ct, PM             | Carbohydrate metabolism                        | 2,02                   |
| CPR1   | YDR155C | Cytoplasmic peptidyl-prolyl cis-trans isomerase              | H/N/M              | Amino acid metabolism                          | 1,16                   |
| EFT1   | YOR133W | Elongation factor two                                        | R                  | Translation                                    | 1,02                   |
| EHT1   | YBR177C | Acyl-coenzymeA:ethanol O-acyltransferase                     | LB/M               | Lipid metabolism                               | 0,23                   |
| ENO1   | YGR254W | Enolase I                                                    | V/M/Cm/PM          | Carbohydrate metabolism                        | 1,75                   |
| ENO2   | YHR174W | Enolase II                                                   | V/PM/M             | Carbohydrate metabolism                        | 3,11                   |
| ERG1   | YGR175C | Squalene epoxidase                                           | ER/LB              | Ergosterol biosynthesis                        | 0,38                   |
| ERG20  | YJL167W | Farnesyl pyrophosphate synthetase                            | Cm/ER              | Ergosterol biosynthesis                        | 0,18                   |
| ERG27  | YLR100W | 3-keto sterol reductase                                      | ER/M               | Ergosterol biosynthesis                        | 0,87                   |
| ERG6   | YML008C | Sterol 24-C-methyltransferase                                | ER/LB/M            | Ergosterol biosynthesis                        | 5,31                   |
| ERG7   | YHR072W | Lanosterol synthase                                          | ER/LB/PM           | Ergosterol biosynthesis                        | 0,91                   |
| FAA1   | YOR317W | Long chain fatty acyl-CoA synthetase                         | LB/M/PM            | Fatty acid oxidation pathway                   | 0,24                   |
| FAA3   | YIL009W | Long chain fatty acyl-CoA synthetase                         | unknown            | Fatty acid oxidation pathway                   | 0,11                   |
| FAA4   | YMR246W | Long chain fatty acyl-CoA synthetase                         | LB/Cm              | Fatty acid oxidation pathway                   | 1,40                   |
| FAS1   | YKL182W | Beta subunit of fatty acid synthetase                        | Ct/Cm/M/LB         | Lipid metabolism                               | 0,04                   |
| FAS2   | YPL231W | Alpha subunit of fatty acid synthetase                       | Cm/M               | Lipid metabolism                               | 0,04                   |

|           |         |                                                             |                 |                                                |      |
|-----------|---------|-------------------------------------------------------------|-----------------|------------------------------------------------|------|
| FAT1      | YBR041W | Very long chain fatty acyl-CoA synthetase                   | ER/LB/PM/P/IntM | Fatty acid oxidation pathway                   | 1,39 |
| FBA1      | YKL060C | Fructose 1,6-bisphosphate aldolase                          | M/Ct/Cm         | Carbohydrate metabolism                        | 3,25 |
| FPR1      | YNL135C | Peptidyl-prolyl cis-trans isomerase                         | Cm/M/N          | Amino acid metabolism                          | 0,34 |
| GND1      | YHR183W | 6-phosphogluconate dehydrogenase                            | Cm/M            | Carbohydrate metabolism                        | 0,11 |
| GPM1      | YKL152C | Glycerate phosphomutase                                     | Ct/M            | Carbohydrate metabolism                        | 1,03 |
| GRS1      | YBR121C | glycyl-tRNA synthase                                        | Cm/M            | Transcription                                  | 0,07 |
| GUA1      | YMR217W | GMP synthase                                                | unknown         | Nucleotide metabolism                          | 0,19 |
| GUK1      | YDR454C | Guanylate kinase                                            | Cm/N            | Nucleotide metabolism                          | 0,27 |
| GUS1      | YGL245W | Glutamyl-tRNA synthetase                                    | M/Cm            | Amino acid metabolism                          | 0,03 |
| GVP36     | YIL041W | BAR domain-containing protein                               | IntM/G/Cm       | Protein trafficking                            | 0,45 |
| HFD1      | YMR110C | Putative fatty aldehyde dehydrogenase                       | E/LB/M          | Lipid metabolism                               | 0,32 |
| HOM6      | YJR139C | Homoserine dehydrogenase                                    | Cm/N            | Amino acid metabolism                          | 0,23 |
| HSC82     | YMR186W | ATPase; Hsp90 family; chaperone                             | Cm/M/PM         | Chaperone / Stress proteins / Oxydoreductase   | 0,65 |
| HSP82     | YPL240C | ATPase; Hsp90 family; chaperone                             | C               | Chaperone / Stress proteins / Oxydoreductase   | 0,56 |
| HXK2      | YGL253W | Hexokinase isoenzyme 2                                      | Ct/M/N          | Carbohydrate metabolism                        | 0,54 |
| HYP2      | YEL034W | Translation elongation factor eIF-5A                        | R/Cm/M          | Translation                                    | 0,54 |
| ILV5      | YLR355C | Acetohydroxyacid reductoisomerase and mtDNA binding protein | M               | Amino acid metabolism                          | 0,82 |
| KAR2      | YJL034W | ATPase; chaperone                                           | ER              | Chaperone / Stress proteins / Oxydoreductase   | 0,10 |
| NUS1      | YDL193W | Nuclear undecaprenyl pyrophosphate synthase                 | N/LB/ER         | Proposed to be involved in protein trafficking | 1,35 |
| OLA1      | YBR025C | P-loop ATPase                                               | Cm              | Unclassified                                   | 0,20 |
| OSW5      | YMR148W | Unknown function                                            | IntM            | Unclassified                                   | 0,81 |
| OYE2      | YHR179W | NADPH oxidoreductase                                        | Cm/M/N          | Chaperone / Stress proteins / Oxydoreductase   | 0,17 |
| PDC1      | YLR044C | Pyruvate decarboxylase                                      | Ct/N            | Amino acid metabolism                          | 2,02 |
| PDP1      | YBR221C | E1 beta subunit of the pyruvate dehydrogenase complex       | M               | Unclassified                                   | 0,11 |
| PDR16     | YNL231C | Phosphatidylinositol transfer protein                       | LB/C/PM         | Lipid metabolism                               | 0,34 |
| PET10     | YKR046C | Unknown function                                            | LB              | Unclassified                                   | 1,52 |
| PFK1      | YGR240C | Phosphofructokinase                                         | Cm/M            | Carbohydrate metabolism                        | 0,20 |
| PGC1      | YPL206C | Phosphatidyl glycerol phospholipase C                       | LB/M            | Lipid metabolism                               | 1,07 |
| PGI1      | YBR196C | Phosphoglucosomerase                                        | Ct/M/PM         | Carbohydrate metabolism                        | 1,23 |
| PGK1      | YCR012W | 3-phosphoglycerate kinase                                   | M/Cm/PM         | Carbohydrate metabolism                        | 1,45 |
| POR1      | YNL055C | Mitochondrial porin                                         | M               | Ion transport                                  | 0,36 |
| PSA1      | YDL055C | GDP-mannose pyrophosphorylase                               | Cm              | Carbohydrate metabolism; protein glycosylation | 0,14 |
| QA23_3395 | nf      | nf                                                          | nf              | Unclassified                                   | 0,74 |
| RER2      | YBR002C | Cis-prenyltransferase                                       | ER              | Protein trafficking                            | 0,31 |

|        |         |                                                               |                      |                     |      |
|--------|---------|---------------------------------------------------------------|----------------------|---------------------|------|
| RHO1   | YPR165W | GTP-binding protein of the rho subfamily of Ras-like proteins | G/P/M/PM             | Signal transduction | 0,19 |
| RHR2   | YIL053W | DL-glycerol-3-phosphatase                                     | Cm/N                 | Lipid metabolism    | 0,67 |
| RPL12A | YEL054C | Ribosomal protein of the large subunit                        | R                    | Ribosome            | 1,16 |
| RPL16B | YNL069C | Ribosomal protein of the large subunit                        | R                    | Ribosome            | 0,30 |
| RPL1A  | YPL220W | Ribosomal protein of the large subunit                        | R                    | Ribosome            | 0,50 |
| RPL20A | YMR242C | Ribosomal protein of the large subunit                        | R                    | Ribosome            | 0,50 |
| RPL27A | YHR010W | Ribosomal protein of the large subunit                        | R                    | Ribosome            | 0,81 |
| RPL4A  | YBR031W | Ribosomal protein of the large subunit                        | R                    | Ribosome            | 0,20 |
| RPL7A  | YGL076C | Ribosomal protein of the large subunit                        | R/Cm                 | Ribosome            | 0,37 |
| RPL7B  | YPL198W | Ribosomal protein of the large subunit                        | R/Cm/N               | Ribosome            | 0,24 |
| RPL8A  | YHL033C | Ribosomal protein of the large subunit                        | R                    | Ribosome            | 0,18 |
| RPL9A  | YGL147C | Ribosomal protein of the large subunit                        | R                    | Ribosome            | 0,76 |
| RPP0   | YLR340W | Ribosomal protein P0                                          | R/Cm                 | Translation         | 1,20 |
| RPS0A  | YGR214W | Ribosomal protein of the small subunit                        | R                    | Ribosome            | 1,01 |
| RPS10B | YMR230W | Ribosomal protein of the small subunit                        | R                    | Ribosome            | 1,01 |
| RPS12  | YOR369C | Ribosomal protein of the small subunit                        | R                    | Ribosome            | 0,67 |
| RPS13  | YDR064W | Ribosomal protein of the small subunit                        | R                    | Ribosome            | 0,45 |
| RPS14A | YCR031C | Ribosomal protein of the small subunit                        | R                    | Ribosome            | 0,97 |
| RPS16A | YMR143W | Ribosomal protein of the small subunit                        | R                    | Ribosome            | 0,27 |
| RPS18A | YDR450W | Ribosomal protein of the small subunit                        | R/M                  | Ribosome            | 0,45 |
| RPS20  | YHL015W | Ribosomal protein of the small subunit                        | R                    | Ribosome            | 0,45 |
| RPS21A | YKR057W | Ribosomal protein of the small subunit                        | R                    | Ribosome            | 0,67 |
| RPS24A | YER074W | Ribosomal protein of the small subunit                        | R/M                  | Ribosome            | 0,54 |
| RPS27A | YKL156W | Ribosomal protein of the small subunit                        | Cm/R                 | Ribosome            | 0,89 |
| RPS28B | YLR264W | Ribosomal protein of the small subunit                        | R                    | Ribosome            | 1,35 |
| RPS3   | YNL178W | Ribosomal protein of the small subunit                        | R                    | Ribosome            | 1,44 |
| RPS4A  | YJR145C | Ribosomal protein of the small subunit                        | Cm/R                 | Ribosome            | 0,81 |
| RPS5   | YJR123W | Ribosomal protein of the small subunit                        | R                    | Ribosome            | 1,05 |
| RPS6A  | YPL090C | Ribosomal protein of the small subunit                        | R                    | Ribosome            | 0,57 |
| RPS7A  | YOR096W | Ribosomal protein of the small subunit                        | R                    | Ribosome            | 0,38 |
| RPS8A  | YBL072C | Ribosomal protein of the small subunit                        | R                    | Ribosome            | 0,38 |
| RPS9A  | YPL081W | Ribosomal protein of the small subunit                        | R/Cm                 | Ribosome            | 0,40 |
| RVB2   | YPL235W | ATP-dependent DNA helicase                                    | N                    | Transcription       | 0,11 |
| SAC6   | YDR129C | Fimbrin                                                       | Actin cortical patch | cytoskeleton        | 0,10 |

|            |         |                                                 |                    |                                                 |      |
|------------|---------|-------------------------------------------------|--------------------|-------------------------------------------------|------|
| SAH1       | YER043C | S-adenosyl-L-homocysteine hydrolase             | Cm                 | Amino acid metabolism                           | 0,17 |
| SAM1       | YLR180W | S-adenosylmethionine synthetase                 | C                  | Amino acid metabolism                           | 0,17 |
| SAM2       | YDR502C | S-adenosylmethionine synthetase                 | Unknown            | Nucleotide metabolism                           | 0,18 |
| SAR1       | YPL218W | GTPase, GTP-binding protein of the ARF family   | COPII vesicle coat | Protein trafficking                             | 0,31 |
| SAY1       | YGR263C | Sterol deacetylase                              | ER/IntM            | Lipid metabolism                                | 0,31 |
| SCP160     | YJL080C | RNA-binding G protein effector                  | ER                 | Unclassified                                    | 0,04 |
| SCRG_02099 | nf      | 6-phosphofructokinase                           | nf                 | Carbohydrate metabolism                         | 0,23 |
| SCY_4030   | nf      | nf                                              | nf                 | Unclassified                                    | 0,54 |
| SEC4       | YFL005W | Rab family GTPase                               | Ve/M/PM            | Protein trafficking                             | 0,67 |
| SHM2       | YLR058C | Serine hydroxymethyltransferase                 | Cm/PM              | Amino acid metabolism                           | 0,11 |
| SLC1       | YDL052C | 1-acyl-sn-glycerol-3-phosphate acyltransferase  | LB                 | Lipid metabolism                                | 0,84 |
| SSA1       | YAL005C | ATPase; stress-seventy subfamily A; chaperone   | V/PM/Cm/N          | Chaperone / Stress proteins<br>/ Oxydoreductase | 1,23 |
| SSA2       | YLL024C | ATP binding protein; stress-seventy subfamily A | V/M/Ct/Cm/PM       | Chaperone / Stress proteins<br>/ Oxydoreductase | 1,52 |
| SSA4       | YER103W | Stress-seventy subfamily A                      | Cm/N               | Chaperone / Stress proteins<br>/ Oxydoreductase | 0,47 |
| SSB1       | YDL229W | ATPase; stress-seventy subfamily B; chaperone   | C/PM               | Chaperone / Stress proteins<br>/ Oxydoreductase | 1,11 |
| SSB2       | YNL209W | ATPase; stress-seventy subfamily B; chaperone   | C/PM               | Chaperone / Stress proteins<br>/ Oxydoreductase | 1,11 |
| SSC1       | YJR045C | Hsp70 family ATPase; stress-seventy subfamily C | M                  | Chaperone / Stress proteins<br>/ Oxydoreductase | 0,83 |
| SSE1       | YPL106C | ATPase; Hsp90; chaperone                        | Cm                 | Chaperone / Stress proteins<br>/ Oxydoreductase | 0,36 |
| SSE2       | YBR169C | HSP70                                           | Cm                 | Chaperone / Stress proteins<br>/ Oxydoreductase | 0,07 |
| SSZ1       | YHR064C | Hsp70 protein                                   | Cm                 | Chaperone / Stress proteins<br>/ Oxydoreductase | 0,29 |
| SUB2       | YDL084W | Component of the TREX complex                   | N                  | Transcription                                   | 0,14 |
| TAL1       | YLR354C | Transaldolase                                   | Cm/N               | Carbohydrate metabolism                         | 0,21 |
| TDH1       | YJL052W | Glyceraldehyde-3-phosphate dehydrogenase        | Cm/LB/M/PM         | Carbohydrate metabolism                         | 0,71 |
| TDH2       | YJR009C | Glyceraldehyde-3-phosphate dehydrogenase        | Cm/LB/M/PM         | Carbohydrate metabolism                         | 1,52 |
| TDH3       | YGR192C | Glyceraldehyde-3-phosphate dehydrogenase        | Cm/LB/M/PM         | Carbohydrate metabolism                         | 1,73 |
| TEF1       | YPR080W | Translation elongation factor 1A                | Cm/M/R             | Translation                                     | 0,89 |
| TEF4       | YKL081W | Translational elongation factor eEF1B           | R/M                | Translation                                     | 0,56 |
| TGL1       | YKL140W | Lipase; sterol esterase                         | LB/IntM            | Lipid metabolism                                | 1,39 |
| TGL3       | YMR313C | Lipase 3                                        | LB                 | Lipid metabolism                                | 0,62 |
| TGL4       | YKR089C | Lipase 4                                        | LB                 | Lipid metabolism                                | 0,25 |
| TGL5       | YOR081C | Lipase 5                                        | LB                 | Lipid metabolism                                | 0,42 |
| TIF1       | YKR059W | Translation initiation factor eIF4A             | R                  | Translation                                     | 0,73 |
| TPI1       | YDR050C | Triose phosphate isomerase                      | M/Cm/PM            | Carbohydrate metabolism                         | 1,35 |
| TSC10      | YBR265W | 3-ketosphinganine reductase                     | Cm/ER/M            | Lipid metabolism                                | 1,01 |

|            |         |                                                                                   |                            |                                              |      |
|------------|---------|-----------------------------------------------------------------------------------|----------------------------|----------------------------------------------|------|
| TY1B       | nf      | nf                                                                                | nf                         | Unclassified                                 | 0,04 |
| VIN13_1550 | nf      | nf                                                                                | nf                         | Unclassified                                 | 0,60 |
| VMA1       | YDL185W | Subunit A of the V1 peripheral membrane domain of vacuolar H <sup>+</sup> -ATPase | V                          | Ion transport                                | 0,04 |
| VMA2       | YBR127C | Subunit B of the V1 peripheral membrane domain of vacuolar H <sup>+</sup> -ATPase | V/Cm/IntM                  | Ion transport                                | 0,20 |
| VMA5       | YKL080W | Subunit C of the V1 peripheral membrane domain of vacuolar H <sup>+</sup> -ATPase | IntM/V                     | Ion transport                                | 0,17 |
| VPS1       | YKR001C | Dynamin-like GTPase                                                               | actin cortical patch/V/P/M | Protein trafficking                          | 0,07 |
| VPS66/LOA1 | YPR139C | Lysophosphatidic acid acyltransferase                                             | ER/LB/Cm                   | Lipid metabolism                             | 0,40 |
| YDR341C    | YDR341C | Arginyl-tRNA synthetase                                                           | Cm                         | Amino acid metabolism                        | 0,07 |
| YEF3       | YLR249W | Translational elongation factor eEF1B                                             | R                          | Translation                                  | 0,41 |
| YEH1       | YLL012W | Steryl ester hydrolase                                                            | LB/IntM                    | Lipid metabolism                             | 0,34 |
| YHB1       | YGR234W | Nitric oxide oxidoreductase                                                       | Ct/M/Cm                    | Chaperone / Stress proteins / Oxydoreductase | 0,18 |
| YJU3       | YKL094W | Monoglyceride lipase                                                              | Cm/PM/LB/M                 | Lipid metabolism                             | 0,18 |
| YMR147W    | YMR147W | Unknown function                                                                  | -                          | Unclassified                                 | 1,20 |
| YOR059C    | YOR059C | Unknown function                                                                  | LB                         | Unclassified                                 | 0,39 |
| YOR246C    | YOR246C | late endosome and Vacuole interface function; oxydoreductase activity             | V/LB                       | Chaperone / Stress proteins / Oxydoreductase | 1,35 |
| YPR147C    | YPR147C | Unknown function                                                                  | Cm                         | Unclassified                                 | 1,16 |
| YPT1       | YFL038C | Rab family GTPase                                                                 | ER/G/M                     | Protein trafficking                          | 0,37 |
| YPT31/8    | YER031C | Rab family GTPase                                                                 | E/G/M                      | Protein trafficking                          | 0,86 |
| YPT7       | YML001W | Rab family GTPase                                                                 | V/M                        | Protein trafficking                          | 0,45 |

LDs were isolated from cells grown in Low C/N YNB medium and collected at the exponential phase. Proteins were identified by at least two different peptides. Database used: Saccharomyces Genome Database (SGD) (<http://www.yeastgenome.org/>). ACT, actin cortical patch; Cm, cytoplasm; Ct, cytosol; E, endosome; ER, endoplasmic reticulum; G, golgi; IntM, integral to membrane; LD, lipid body or Lipid Droplet; M, mitochondria; N, nucleus; P, peroxysome; PM, plasma membrane; V, vacuole; Ve, vesicle. Only main functions and localizations were described for each protein.

**Table S2. Complete list of potential Ypt7p partners identified by LC-MS/MS**

| Band (approximate apparent MW) | ORF                | Gene    | Function / Description (SGD)                                                      | Localization (SGD)    | Metabolism / Pathway (SGD)                  | PAI                                         |
|--------------------------------|--------------------|---------|-----------------------------------------------------------------------------------|-----------------------|---------------------------------------------|---------------------------------------------|
| 85 kDa Glycine elution         | MET6               | YER091C | Methyltetrahydropteroyltriglutamate-homocysteine methyltransferase                | Cm/PM                 | Amino acid metabolism                       | 0,4                                         |
| 63 kDa Glycine elution         | TGL1               | YKL140W | Lipase; Sterol esterase                                                           | LB/IntM               | Lipid metabolism                            | 0,1                                         |
| 51 kDa Glycine elution         | YSC84              | YHR016C | Actin-binding protein                                                             | Actin cortical patch  | Cytoskeleton                                | 0,4                                         |
|                                | GND1               | YHR183W | 6-phosphogluconate dehydrogenase                                                  | Cm/M                  | Carbohydrate metabolism                     | 0,3                                         |
|                                | YPT7               | YML001W | Rab family GTPase                                                                 | V/M                   | Trafficking protein                         | 0,4                                         |
| 40 kDa Glycine elution         | PEP4               | YPL154C | Vacuolar aspartyl protease (proteinase A)                                         | V/M                   | -                                           | 0,4                                         |
|                                | LSP1               | YPL004C | Member of the BAR domain family                                                   | Eisosome/Cm/M/PM      | -                                           | 0,1                                         |
| 37 kDa Glycine elution         | ADH1               | YOL086C | Alcohol dehydrogenase                                                             | Ct, PM                | Amino acid metabolism; Glucose fermentation | 0,9                                         |
|                                | TAL1               | YLR354C | Transaldolase                                                                     | Cm/N                  | Carbohydrate metabolism                     | 0,2                                         |
| 30 kDa Glycine elution         | PET10              | YKR046C | Unknown function                                                                  | LB                    | -                                           | 0,4                                         |
|                                | POR1               | YNL055C | Porin                                                                             | M                     | Ion transport                               | 0,3                                         |
| 51 kDa SDS elution             | GND1               | YHR183W | 6-phosphogluconate dehydrogenase                                                  | Cm/M                  | Carbohydrate metabolism                     | 0,9                                         |
|                                | EHT1               | YBR177C | Acyl-coenzymeA:ethanol O-acyltransferase                                          | LB/M                  | Lipid metabolism                            | 0,5                                         |
|                                | YSC84              | YHR016C | Actin-binding protein                                                             | Actin cortical patch  | Cytoskeleton                                | 0,6                                         |
|                                | VMA13              | YPR036W | Subunit H of the V1 peripheral membrane domain of vacuolar H <sup>+</sup> -ATPase | IntM/V                | Ion transport                               | 0,4                                         |
|                                | YPT7               | YML001W | Rab family GTPase                                                                 | V/M                   | Trafficking protein                         | 0,6                                         |
|                                | KES1               | YPL145C | Member of the oxysterol binding protein family                                    | G/IntM/Cm             | Trafficking protein                         | 0,3                                         |
|                                | YMR027W            | YMR027W | Unknown function                                                                  | Cm/N                  | -                                           | 0,2                                         |
|                                | GDI1               | YER136W | GDP dissociation inhibitor                                                        | Vesicle               | Trafficking protein                         | 0,3                                         |
|                                | LYS20              | YDL182W | Homocitrate synthase isozyme                                                      | N/M                   | Amino acid metabolism                       | 0,2                                         |
|                                | SER33              | YIL074C | 3-phosphoglycerate dehydrogenase                                                  | Cm                    | Amino acid metabolism                       | 0,1                                         |
|                                | FUM1               | YPL262W | Fumarase                                                                          | Ct/M                  | TAC cycle                                   | 0,2                                         |
|                                | AIM17              | YHL021C | Unknown function                                                                  | M                     | -                                           | 0,1                                         |
|                                | 37 kDa SDS elution | ADH1    | YOL086C                                                                           | Alcohol dehydrogenase | Ct, PM                                      | Amino acid metabolism; Glucose fermentation |
| PGK1                           |                    | YCR012W | 3-phosphoglycerate kinase                                                         | M/Cm/PM               | Carbohydrate metabolism                     | 0,8                                         |
| TAL1                           |                    | YLR354C | Transaldolase                                                                     | Cm/N                  | Carbohydrate metabolism                     | 0,9                                         |
| HOM6                           |                    | YJR139C | Homoserine dehydrogenase                                                          | Cm/N                  | Amino acid metabolism                       | 0,8                                         |
| YPR127W                        |                    | YPR127W | Unknown function                                                                  | Ct/N                  | -                                           | 0,6                                         |
| TDH3                           |                    | YGR192C | Glyceraldehyde-3-phosphate dehydrogenase                                          | Cm/LB/M/PM            | Carbohydrate metabolism                     | 0,7                                         |
| ILV5                           |                    | YLR355C | Acetohydroxyacid reductoisomerase and mtDNA binding protein                       | M                     | Amino acid biosynthesis                     | 0,5                                         |
| GRE2                           |                    | YOL151W | 3-methylbutanal reductase                                                         | Cm/N                  | Lipid metabolism; response to stress        | 0,2                                         |
| ADO1                           |                    | YJR105W | Adenosine kinase                                                                  | Cm/N                  | Nucleotide metabolism                       | 0,3                                         |
| MDH3                           |                    | YDL078C | Malate dehydrogenase                                                              | P                     | Fatty-acid oxidation pathway                | 0,2                                         |



|                    |       |         |                                                                    |                      |                                                |     |
|--------------------|-------|---------|--------------------------------------------------------------------|----------------------|------------------------------------------------|-----|
|                    | IDH2  | YOR136W | Isocitrate dehydrogenase                                           | M                    | TAC cycle                                      | 0,2 |
|                    | CDC10 | YCR002C | Septin; GTPase                                                     | N                    | Cell Division Cycle                            | 0,1 |
|                    | FBA1  | YKL060C | Fructose 1,6-bisphosphate aldolase                                 | M/Ct/Cm              | Carbohydrate metabolism                        | 0,2 |
|                    | RPP0  | YLR340W | Ribosomal protein P0                                               | R/Cm                 | Translation                                    | 1   |
|                    | ASC1  | YMR116C | Guanine nucleotide-binding protein subunit beta-like protein       | R/Cm                 | Signal transduction                            | 0,5 |
|                    | ADH1  | YOL086C | Alcohol dehydrogenase                                              | Ct, PM               | Amino acid metabolism;<br>Glucose fermentation | 0,4 |
|                    | PET9  | YBL030C | ADP/ATP carrier                                                    | IntM/M               | -                                              | 0,4 |
|                    | BMH2  | YDR099W | 14-3-3 protein                                                     | N/PM                 | Signal transduction                            | 0,4 |
|                    | IPP1  | YBR011C | Inorganic pyrophosphatase                                          | Ct                   | -                                              | 0,5 |
| 34 kDa SDS elution | AYR1  | YIL124W | 1-acyldihydroxyacetone-phosphate reductase                         | ER/LB/Cm/IntM/M      | Lipid metabolism                               | 0,3 |
|                    | SNF4  | YGL115W | Activating gamma subunit of the AMP-activated Snf1p kinase complex | Cm/N/PM              | -                                              | 0,2 |
|                    | TSC10 | YBR265W | 3-ketosphinganine reductase                                        | Cm/ER/M              | Lipid metabolism                               | 0,3 |
|                    | ERG27 | YLR100W | 3-keto sterol reductase                                            | ER/M                 | Ergosterol biosynthesis                        | 0,2 |
|                    | PRE10 | YOR362C | Proteinase yscE                                                    | Proteasome/ER/N/M    | Protein metabolism                             | 0,2 |
|                    | PHB1  | YGR132C | Subunit of the prohibitin complex; Chaperone                       | M                    | -                                              | 0,2 |
|                    | CAP2  | YIL034C | Beta subunit of the capping protein (CP) heterodimer               | Actin cortical patch | Cytoskeleton                                   | 0,3 |

Proteins were identified by at least two different peptides. Database used: Saccharomyces Genome Database (SGB) (<http://www.yeastgenome.org/>). ACT, actin cortical patch; Cm, cytoplasm; Ct, cytosol; E, endosome; ER, endoplasmic reticulum; G, golgi; IntM, integral to membrane; LD, lipid body or Lipid droplet; M, mitochondria; N, nucleus; P, peroxysome; PM, plasma membrane; V, vacuole; Ve, vesicle. Only main functions and localizations were described for each protein.
